# Supplementary material for: Metabolomics and proteomics technologies to explore the herbal preparation affecting metabolic disorders using high resolution mass spectrometry
Source: Royal Society of Chemistry journal article supplement (doi:10.1039/c6mb00677a), 2016-12-14
Supplement: c6mb00677a1.pdf [file c6mb00677a1.pdf]

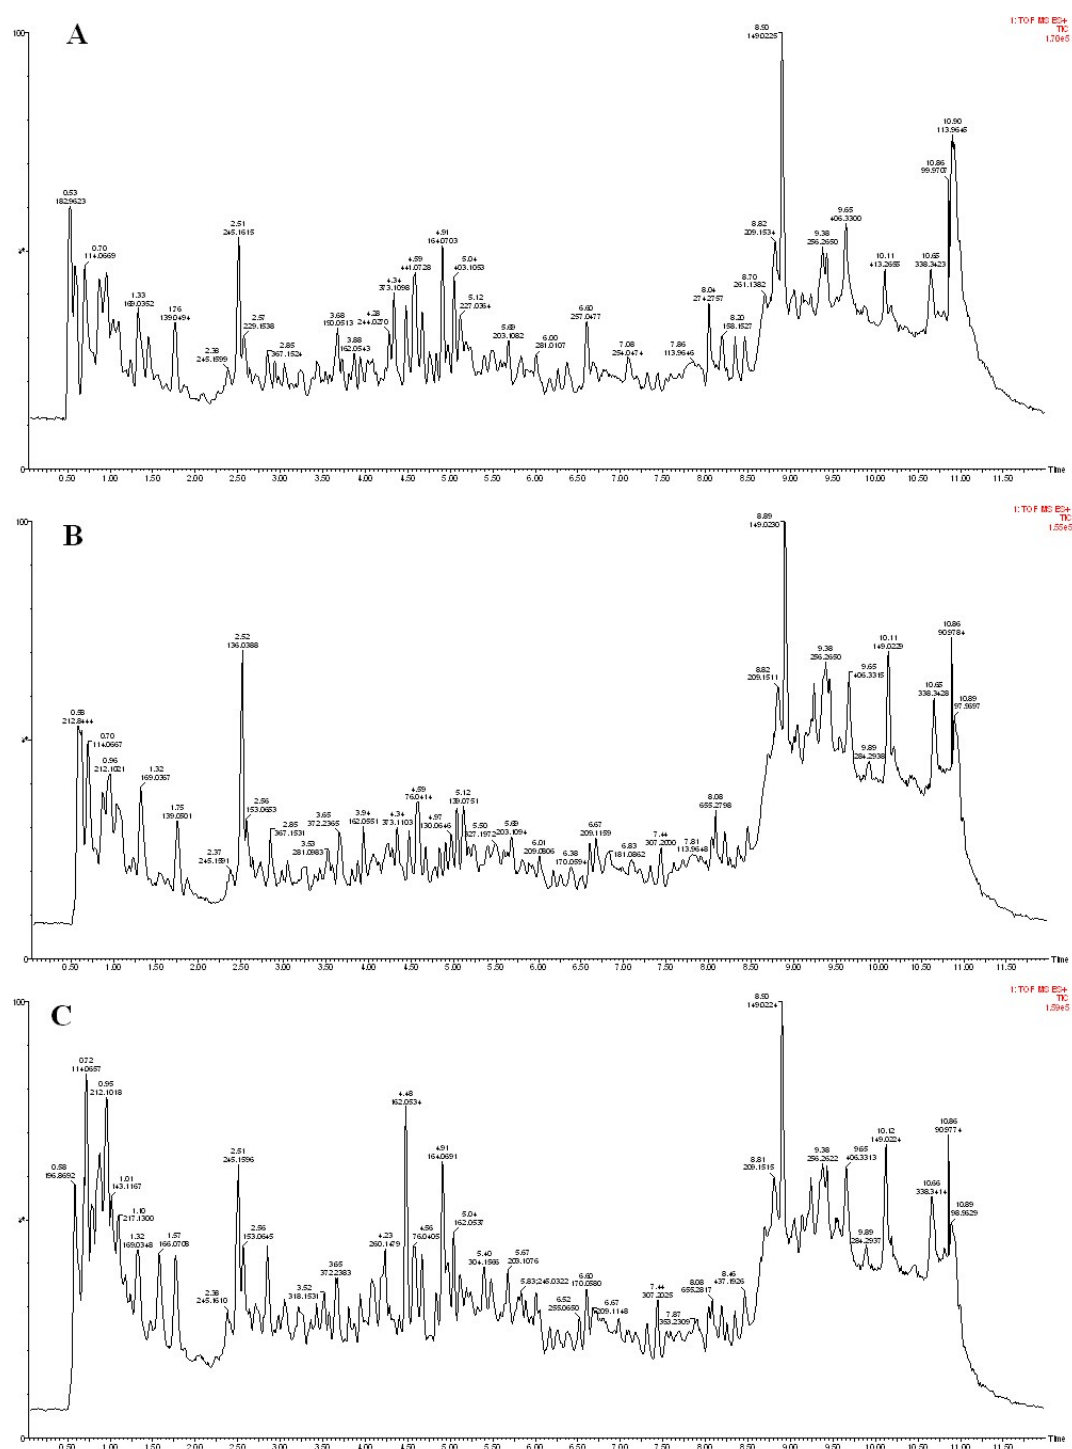

**Fig. S1.** Typical total ion chromatograms (TIC) obtained from rat urine in the positive mode.

Control group (A), model group (B), JSP-treated group (C).

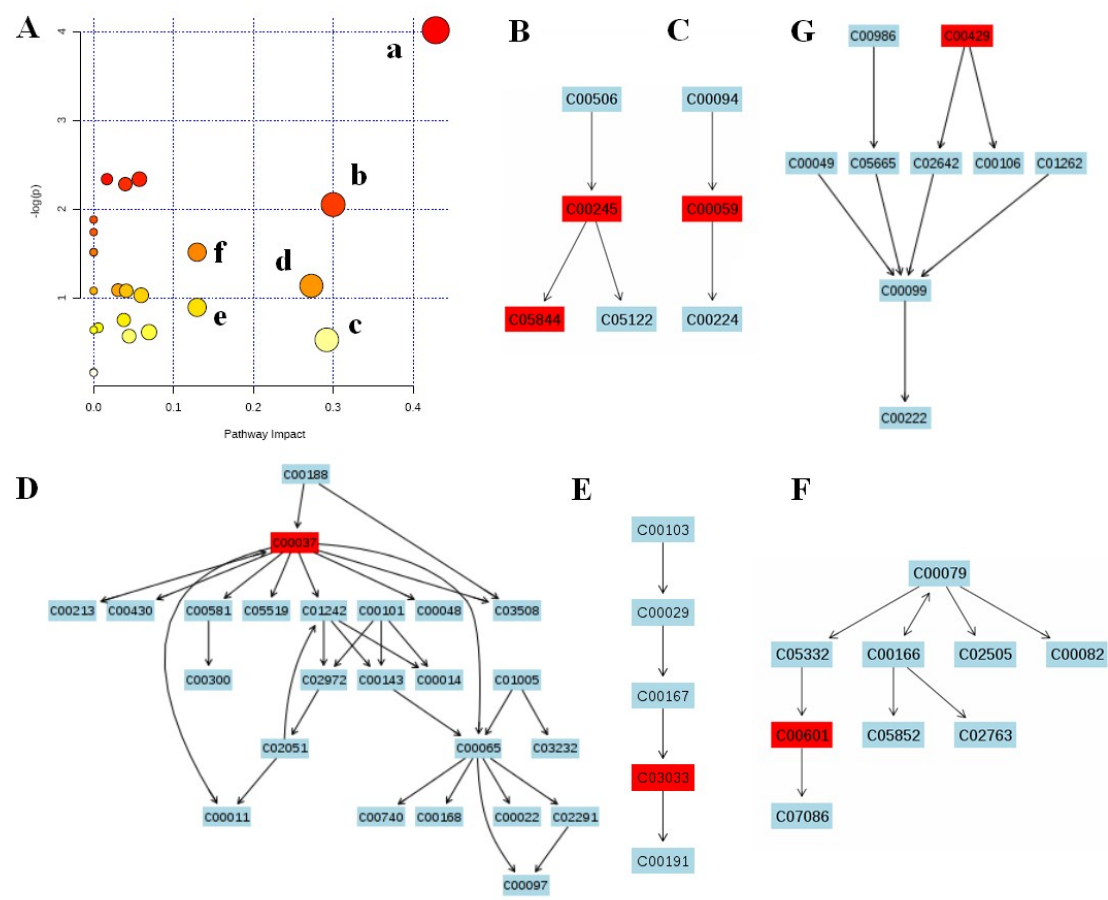

**Fig.S2** Summary of pathway analysis with MetPA (A). Taurine and hypotaurine metabolism (B), Sulfur metabolism (C), Glycine, serine and threonine metabolism (D), Pentose and glucuronate interconversions (E), Phenylalanine metabolism (F), beta-Alanine metabolism (G)

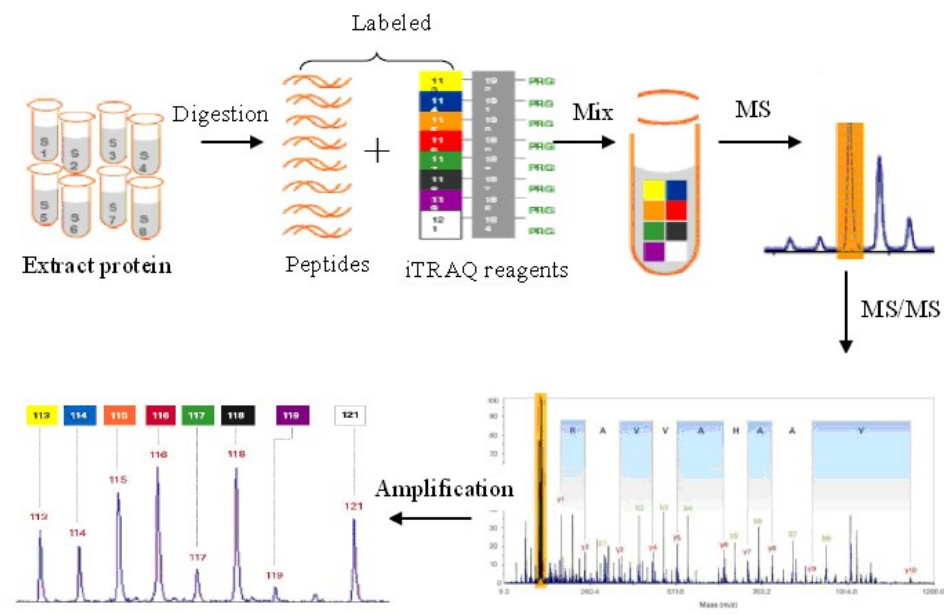

**Fig. S3** The iTRAQ quantitative proteomic analyses.

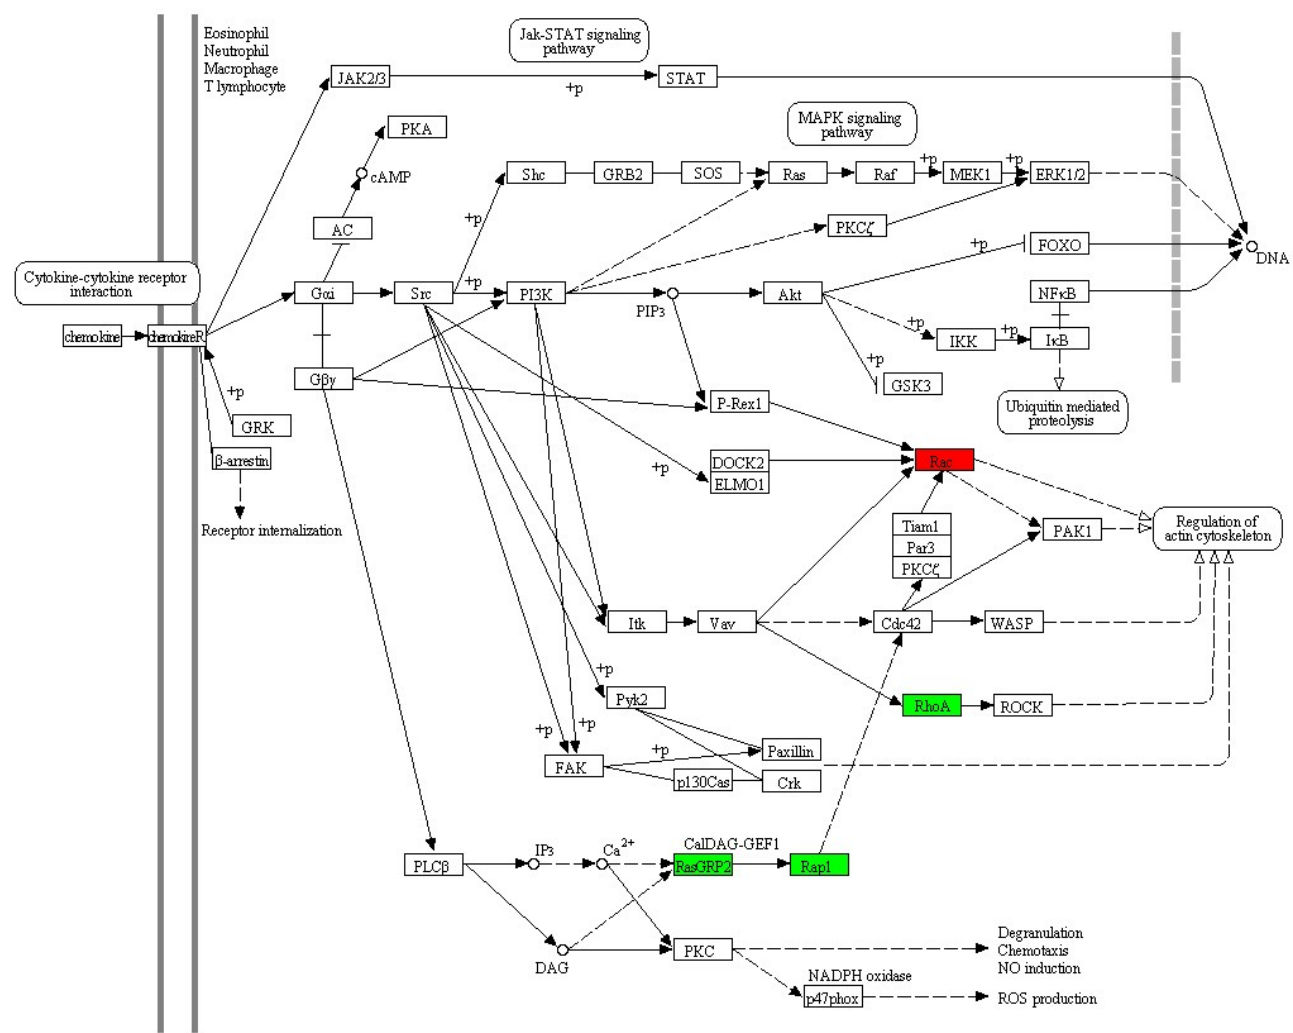

**Fig.S4** iTRAQ-proteomics analysis for Pathway map of the chemokine signaling pathway (KEGG) with marked entries. Decreased (green nodes), increased (red nodes).

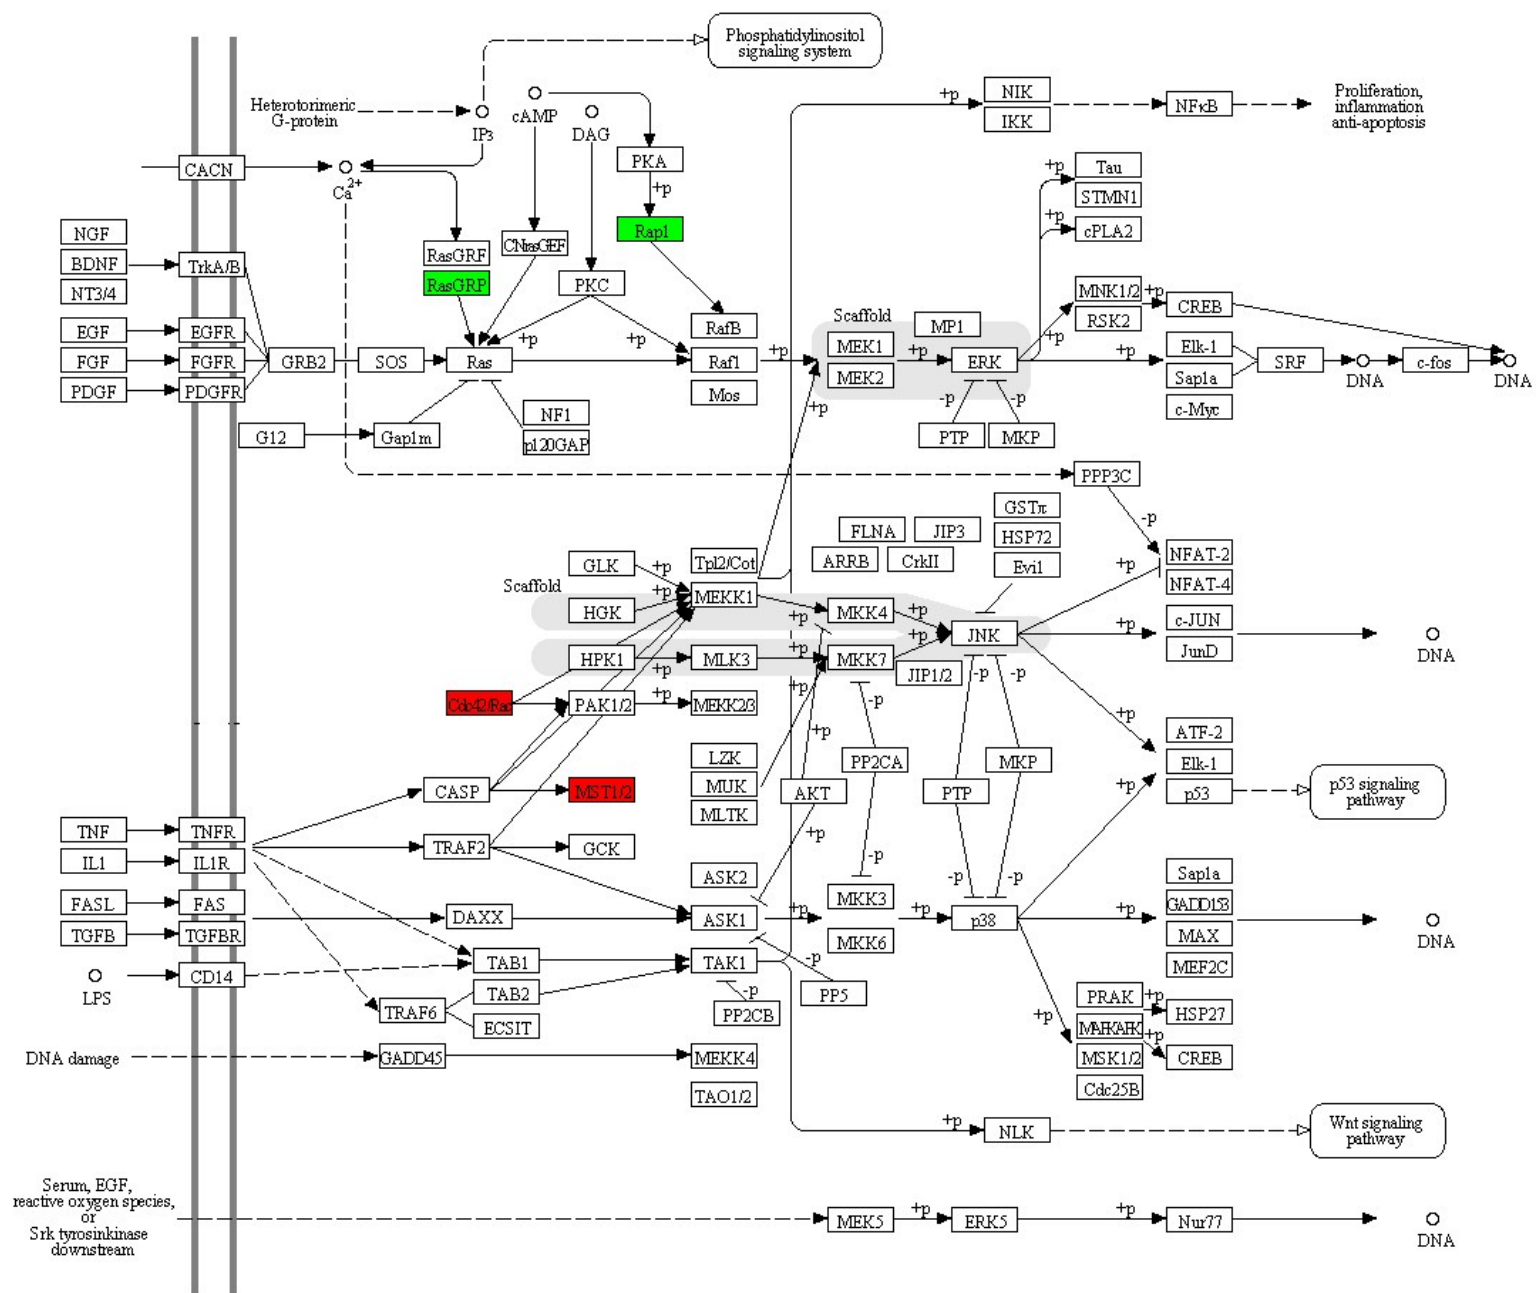

**Fig.S5** Regulation of MAPK signaling pathway. The map was generated using the reference map by KEGG (<http://www.genome.jp/kegg/>). Decreased (green nodes), increased (red nodes).

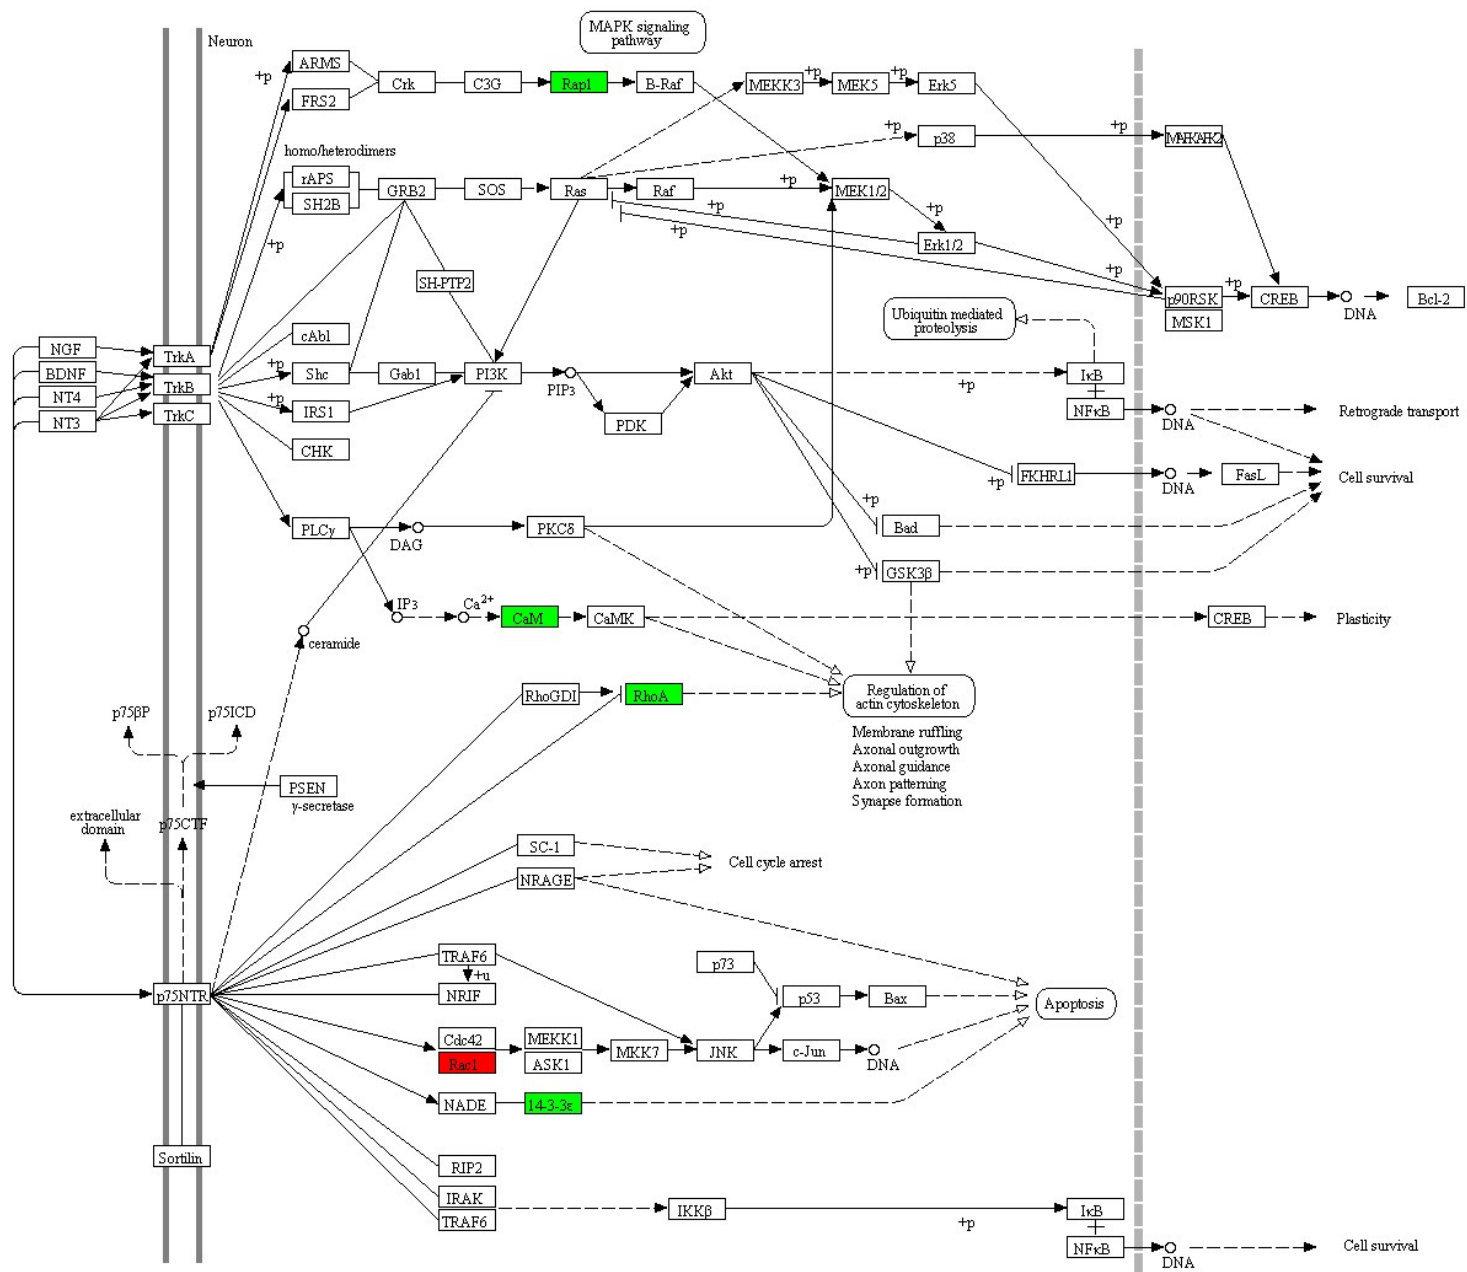

**Fig. S6** Regulation of neurotrophin signaling pathway.

The map was generated using the reference map by KEGG (<http://www.genome.jp/kegg/>). Decreased (green nodes), increased (red nodes).

**Table S1.** Identification and change trend of marker metabolites related with KYDS based on urine metabolic profiling.

| No. | Rt (min) | m/z determined | m/z calculated | Error (ppm) | Ion form              | Molecular Formula                                                | Metabolite Name                                                 | VIP Value | Trend |
|-----|----------|----------------|----------------|-------------|-----------------------|------------------------------------------------------------------|-----------------------------------------------------------------|-----------|-------|
| 1   | 6.52     | 255.0651       | 255.0651       | 0           | [M+H] <sup>+</sup>    | C <sub>7</sub> H <sub>14</sub> N <sub>2</sub> O <sub>6</sub> S   | 5-L-Glutamyl-aurine                                             | 8.62363   | ↑     |
| 2   | 4.06     | 121.0657       | 121.0653       | 3.3         | [M+H] <sup>+</sup>    | C <sub>8</sub> H <sub>8</sub> O                                  | Phenylacetaldehyde                                              | 4.48357   | ↑     |
| 3   | 5.04     | 162.0551       | 162.0555       | -2.5        | [M+H] <sup>+</sup>    | C <sub>9</sub> H <sub>7</sub> NO <sub>2</sub>                    | 4,6-Dihydroxyquinoline                                          | 5.86728   | ↑     |
| 4   | 3.46     | 206.0449       | 206.0453       | -1.9        | [M+H] <sup>+</sup>    | C <sub>10</sub> H <sub>7</sub> NO <sub>4</sub>                   | Xanthurenic acid                                                | 7.24889   | ↓     |
| 5   | 4.06     | 180.1017       | 180.1025       | -4.4        | [M+H] <sup>+</sup>    | C <sub>10</sub> H <sub>13</sub> NO <sub>2</sub>                  | (R)-Salsolinol                                                  | 2.83317   | ↑     |
| 6   | 1.44     | 190.1194       | 190.1192       | 1.1         | [M+H] <sup>+</sup>    | C <sub>7</sub> H <sub>15</sub> N <sub>3</sub> O <sub>3</sub>     | L-Homocitrulline                                                | 3.47929   | ↑     |
| 7   | 0.73     | 129.0660       | 129.0664       | -3.1        | [M+H] <sup>+</sup>    | C <sub>5</sub> H <sub>8</sub> N <sub>2</sub> O <sub>2</sub>      | Hydrouracil                                                     | 3.29001   | ↓     |
| 8   | 5.75     | 349.2378       | 349.2379       | -0.3        | [M+H] <sup>+</sup>    | C <sub>21</sub> H <sub>32</sub> O <sub>4</sub>                   | 11β,21-Dihydroxy-5β-pregnane-3,20-dione                         | 2.8392    | ↑     |
| 9   | 4.21     | 126.0224       | 126.0225       | -0.8        | [M+H] <sup>+</sup>    | C <sub>2</sub> H <sub>7</sub> NO <sub>3</sub> S                  | Taurine                                                         | 4.40552   | ↑     |
| 10  | 0.87     | 229.1194       | 229.1188       | 2.6         | [M+H] <sup>+</sup>    | C <sub>10</sub> H <sub>16</sub> N <sub>2</sub> O <sub>4</sub>    | Prolylhydroxyproline                                            | 6.2257    | ↓     |
| 11  | 1.19     | 124.0397       | 124.0399       | -1.6        | [M+H] <sup>+</sup>    | C <sub>6</sub> H <sub>5</sub> NO <sub>2</sub>                    | Niacin (Nicotinic acid)                                         | 3.89617   | ↓     |
| 12  | 0.87     | 176.1030       | 176.1035       | -2.8        | [M+H] <sup>+</sup>    | C <sub>6</sub> H <sub>13</sub> N <sub>3</sub> O <sub>3</sub>     | Citrulline                                                      | 4.05663   | ↓     |
| 13  | 3.68     | 190.0502       | 190.0504       | -1.1        | [M+H] <sup>+</sup>    | C <sub>10</sub> H <sub>7</sub> NO <sub>3</sub>                   | Kynurenic acid                                                  | 6.27684   | ↓     |
| 14  | 0.92     | 127.0505       | 127.0508       | -2.4        | [M+H] <sup>+</sup>    | C <sub>5</sub> H <sub>6</sub> N <sub>2</sub> O <sub>2</sub>      | Thymine                                                         | 7.86767   | ↑     |
| 15  | 0.92     | 259.0929       | 259.0930       | -0.4        | [M+H] <sup>+</sup>    | C <sub>10</sub> H <sub>14</sub> N <sub>2</sub> O <sub>6</sub>    | ribosylimidazoleacetic acid                                     | 5.34566   | ↑     |
| 16  | 1.26     | 112.0516       | 112.0511       | 4.5         | [M+H] <sup>+</sup>    | C <sub>4</sub> H <sub>5</sub> N <sub>3</sub> O                   | Cytosine                                                        | 2.89274   | ↓     |
| 17  | 1.27     | 138.0923       | 138.0919       | 2.9         | [M+H] <sup>+</sup>    | C <sub>8</sub> H <sub>11</sub> NO                                | Tyramine                                                        | 3.08608   | ↑     |
| 18  | 5.15     | 215.0327       | 215.0321       | 2.8         | [M+H] <sup>+</sup>    | C <sub>5</sub> H <sub>11</sub> O <sub>7</sub> P                  | Deoxyribose 1-phosphate                                         | 3.55279   | ↓     |
| 19  | 2.51     | 174.1244       | 174.1243       | 0.6         | [M+H] <sup>+</sup>    | C <sub>7</sub> H <sub>15</sub> N <sub>3</sub> O <sub>2</sub>     | apo-[3-methylcrotonoyl-CoA:carbon-dioxide ligase (ADP-forming)] | 3.56549   | ↑     |
| 20  | 1.15     | 204.1229       | 204.1236       | -3.4        | [M+H] <sup>+</sup>    | C <sub>9</sub> H <sub>17</sub> NO <sub>4</sub>                   | Acetylcarnitine                                                 | 3.25817   | ↓     |
| 21  | 2.93     | 197.0309       | 197.0311       | -1.0        | [M+H] <sup>+</sup>    | C <sub>6</sub> H <sub>4</sub> N <sub>4</sub> O <sub>4</sub>      | Xanthine-8-carboxylate                                          | 2.87283   | ↑     |
| 22  | 5.12     | 302.1394       | 302.1392       | 0.7         | [M+H] <sup>+</sup>    | C <sub>17</sub> H <sub>19</sub> NO <sub>4</sub>                  | noroxycodone                                                    | 2.75347   | ↓     |
| 23  | 4.6      | 315.0594       | 315.0593       | 0.3         | [M+H] <sup>+</sup>    | C <sub>8</sub> H <sub>15</sub> N <sub>2</sub> O <sub>9</sub> P   | 5'-Phosphoribosyl-N-formylglycinamide (FGAR)                    | 2.50632   | ↓     |
| 24  | 4.99     | 130.0653       | 130.0657       | -3.1        | [M+H] <sup>+</sup>    | C <sub>9</sub> H <sub>7</sub> N                                  | Quinoline                                                       | 7.92895   | ↑     |
| 25  | 1.27     | 314.1236       | 314.1240       | -1.3        | [M+H] <sup>+</sup>    | C <sub>14</sub> H <sub>19</sub> NO <sub>7</sub>                  | Tyramine glucuronide                                            | 5.50204   | ↑     |
| 26  | 5.04     | 270.0382       | 270.0379       | 1.1         | [M+H] <sup>+</sup>    | C <sub>7</sub> H <sub>12</sub> NO <sub>8</sub> P                 | N-Acetyl-L-glutamate 5-phosphate                                | 5.33969   | ↓     |
| 27  | 6.4      | 170.0590       | 170.0582       | 4.7         | [M+H] <sup>+</sup>    | C <sub>4</sub> H <sub>12</sub> NO <sub>4</sub> P                 | Phosphorylcholine                                               | 6.66665   | ↑     |
| 28  | 1.78     | 139.0505       | 139.0508       | -2.2        | [M+H] <sup>+</sup>    | C <sub>6</sub> H <sub>6</sub> N <sub>2</sub> O <sub>2</sub>      | Nicotinamide N-oxide                                            | 4.60596   | ↓     |
| 29  | 0.77     | 143.0825       | 143.0821       | 2.8         | [M+H] <sup>+</sup>    | C <sub>6</sub> H <sub>10</sub> N <sub>2</sub> O <sub>2</sub>     | Ectoine                                                         | 4.60012   | ↓     |
| 30  | 2.3      | 271.1397       | 241.1406       | -3.3        | [M+H] <sup>+</sup>    | C <sub>11</sub> H <sub>18</sub> N <sub>4</sub> O <sub>4</sub>    | 2-[3-Carboxy-3-(methylammonio)propyl]-L-histidine               | 4.22563   | ↑     |
| 31  | 1.03     | 141.0660       | 141.0664       | -2.8        | [M+H] <sup>+</sup>    | C <sub>6</sub> H <sub>8</sub> N <sub>2</sub> O <sub>2</sub>      | 1,4-Methylimidazoleacetic acid                                  | 3.15977   | ↓     |
| 32  | 0.94     | 194.0923       | 194.0930       | -3.6        | [M+H] <sup>+</sup>    | C <sub>9</sub> H <sub>11</sub> N <sub>3</sub> O <sub>2</sub>     | 4-(Nitrosoamino)-1-(3-pyridinyl)-1-butanone                     | 2.95164   | ↓     |
| 33  | 1.04     | 190.0168       | 190.0174       | -3.2        | [M+H] <sup>+</sup>    | C <sub>6</sub> H <sub>7</sub> NO <sub>4</sub> S                  | Lanthionine ketimine                                            | 3.8959    | ↑     |
| 34  | 0.73     | 138.0551       | 138.0555       | -2.9        | [M+H] <sup>+</sup>    | C <sub>7</sub> H <sub>7</sub> NO <sub>2</sub>                    | Anthranilic acid                                                | 2.99686   | ↑     |
| 35  | 2.58     | 145.0502       | 145.0501       | 0.7         | [M+H] <sup>+</sup>    | C <sub>6</sub> H <sub>8</sub> O <sub>4</sub>                     | 3-hexenedioic acid                                              | 2.82142   | ↓     |
| 36  | 5.14     | 399.1465       | 399.1451       | 3.5         | [M+H] <sup>+</sup>    | C <sub>15</sub> H <sub>22</sub> N <sub>6</sub> O <sub>5</sub> S  | S-Adenosylmethionine                                            | 2.70582   | ↓     |
| 37  | 2.93     | 345.0771       | 345.0786       | -4.3        | [M+H] <sup>+</sup>    | C <sub>12</sub> H <sub>17</sub> N <sub>4</sub> O <sub>4</sub> PS | Thiamine monophosphate                                          | 2.68747   | ↓     |
| 38  | 1.08     | 86.0603        | 86.0606        | -3.5        | [M+H] <sup>+</sup>    | C <sub>4</sub> H <sub>7</sub> NO                                 | 2-Pyrrolidinone                                                 | 2.60115   | ↓     |
| 39  | 3.44     | 178.0531       | 178.0538       | -3.9        | [M+H] <sup>+</sup>    | C <sub>6</sub> H <sub>11</sub> NO <sub>3</sub> S                 | N-Formylmethionine                                              | 2.55577   | ↓     |
| 40  | 4.23     | 181.0868       | 181.0865       | 1.7         | [M+H] <sup>+</sup>    | C <sub>10</sub> H <sub>12</sub> O <sub>3</sub>                   | 3-Methoxybenzenepropanoic acid                                  | 2.51977   | ↓     |
| 41  | 2.94     | 144.0655       | 144.0661       | -4.2        | [M-H] <sup>-</sup>    | C <sub>6</sub> H <sub>11</sub> NO <sub>3</sub>                   | Allysine                                                        | 4.88062   | ↓     |
| 42  | 3.91     | 228.0879       | 228.0872       | 3.1         | [M-HCOO] <sup>-</sup> | C <sub>9</sub> H <sub>13</sub> NO <sub>3</sub>                   | Epinephrine                                                     | 2.70176   | ↓     |
| 43  | 1.12     | 187.0715       | 187.0719       | -2.1        | [M-H] <sup>-</sup>    | C <sub>7</sub> H <sub>12</sub> N <sub>2</sub> O <sub>4</sub>     | Nα-Acetyl-L-glutamine                                           | 5.30931   | ↓     |
| 44  | 3.09     | 225.0865       | 225.0875       | -4.4        | [M-HCOO] <sup>-</sup> | C <sub>9</sub> H <sub>12</sub> N <sub>2</sub> O <sub>2</sub>     | 5-Hydroxykynurenamine                                           | 2.55661   | ↓     |
| 45  | 3.59     | 280.0821       | 280.0821       | 0           | [M-H] <sup>-</sup>    | C <sub>13</sub> H <sub>15</sub> NO <sub>6</sub>                  | 4-Hydroxyphenylacetylglutamine                                  | 3.92032   | ↑     |
| 46  | 5.64     | 248.0934       | 248.0923       | 4.4         | [M-HCOO] <sup>-</sup> | C <sub>12</sub> H <sub>13</sub> NO <sub>2</sub>                  | 3-Indolebutyric acid                                            | 3.4496    | ↑     |
| 47  | 7.41     | 365.2314       | 365.2328       | -3.8        | [M-H] <sup>-</sup>    | C <sub>21</sub> H <sub>34</sub> O <sub>5</sub>                   | 5α-Tetrahydrocortisol                                           | 3.28775   | ↑     |
| 48  | 1.39     | 96.9596        | 96.9596        | 0           | [M-H] <sup>-</sup>    | H <sub>2</sub> O <sub>4</sub> S                                  | Sulfuric acid                                                   | 5.79567   | ↑     |
| 49  | 3.74     | 144.0451       | 144.0449       | 1.4         | [M-H] <sup>-</sup>    | C <sub>9</sub> H <sub>7</sub> NO                                 | 3-methyleneoxindole                                             | 4.23378   | ↓     |
| 50  | 2.78     | 264.0518       | 264.0508       | 3.8         | [M-HCOO] <sup>-</sup> | C <sub>11</sub> H <sub>9</sub> NO <sub>4</sub>                   | 5-Hydroxyindolepyruvate                                         | 4.42036   | ↑     |
| 51  | 2.95     | 74.0243        | 74.0242        | 1.4         | [M-H] <sup>-</sup>    | C <sub>2</sub> H <sub>5</sub> NO <sub>2</sub>                    | Glycine                                                         | 3.5757    | ↓     |
| 52  | 6.75     | 239.0920       | 239.0919       | 0.4         | [M-H] <sup>-</sup>    | C <sub>12</sub> H <sub>16</sub> O <sub>5</sub>                   | 3-carboxy-4-methyl-5-propyl-2-furanpropanoic acid               | 3.02591   | ↑     |
| 53  | 3.87     | 242.0435       | 242.0430       | 2.1         | [M-HCOO] <sup>-</sup> | C <sub>5</sub> H <sub>12</sub> NO <sub>5</sub> P                 | 2-Amino-5-phosphopentanoic acid                                 | 6.01274   | ↑     |
| 54  | 4.94     | 159.1015       | 159.1021       | -3.8        | [M-H] <sup>-</sup>    | C <sub>8</sub> H <sub>16</sub> O <sub>3</sub>                    | 7-Hydroxyoctanoic acid                                          | 2.91417   | ↓     |
| 55  | 2.83     | 142.0504       | 142.0504       | 0           | [M-H] <sup>-</sup>    | C <sub>6</sub> H <sub>9</sub> NO <sub>3</sub>                    | Vinylacetylglutamine                                            | 2.81308   | ↓     |
| 56  | 5.47     | 236.0934       | 236.0923       | 4.7         | [M-HCOO] <sup>-</sup> | C <sub>11</sub> H <sub>13</sub> NO <sub>2</sub>                  | 5-Methoxytryptophol                                             | 3.42729   | ↑     |
| 57  | 6.6      | 187.1326       | 187.1334       | -4.3        | [M-H] <sup>-</sup>    | C <sub>10</sub> H <sub>20</sub> O <sub>3</sub>                   | 3-Hydroxycapric acid                                            | 4.66398   | ↓     |
| 58  | 5.1      | 147.0403       | 147.0406       | -2.0        | [M-HCOO] <sup>-</sup> | C <sub>3</sub> H <sub>6</sub> N <sub>2</sub> O <sub>2</sub>      | N-Formiminoglycine                                              | 2.53224   | ↑     |
| 59  | 1.59     | 238.0351       | 238.0352       | -0.4        | [M-HCOO] <sup>-</sup> | C <sub>9</sub> H <sub>7</sub> NO <sub>4</sub>                    | L-Dopachrome                                                    | 2.8595    | ↑     |
| 60  | 3.86     | 338.0817       | 338.0876       | -1.5        | [M-H] <sup>-</sup>    | C <sub>15</sub> H <sub>17</sub> NO <sub>8</sub>                  | 6-Hydroxy-5-methoxyindole glucuronide                           | 3.62112   | ↓     |

Note: '↑' and '↓' represent the compounds which were up- and down-regulated in the KYDS group compared with the control group.

**Table S2.** Result from ingenuity pathway analysis with MetPA

| Name                                     | Total | Expected | Hits | Raw p    | Impact  |
|------------------------------------------|-------|----------|------|----------|---------|
| Taurine and hypotaurine metabolism       | 8     | 0.21683  | 2    | 0.018075 | 0.42857 |
| Tryptophan metabolism                    | 41    | 1.1113   | 3    | 0.096574 | 0.01663 |
| Pyrimidine metabolism                    | 41    | 1.1113   | 3    | 0.096574 | 0.0573  |
| Tyrosine metabolism                      | 42    | 1.1384   | 3    | 0.10212  | 0.03971 |
| Sulfur metabolism                        | 5     | 0.13552  | 1    | 0.12854  | 0.3     |
| Cyanoamino acid metabolism               | 6     | 0.16262  | 1    | 0.15225  | 0       |
| Thiamine metabolism                      | 7     | 0.18973  | 1    | 0.17533  | 0       |
| Methane metabolism                       | 9     | 0.24394  | 1    | 0.21966  | 0       |
| Nitrogen metabolism                      | 9     | 0.24394  | 1    | 0.21966  | 0       |
| Phenylalanine metabolism                 | 9     | 0.24394  | 1    | 0.21966  | 0.12963 |
| Pentose and glucuronate interconversions | 14    | 0.37946  | 1    | 0.32058  | 0.27273 |
| Arginine and proline metabolism          | 44    | 1.1926   | 2    | 0.33659  | 0.03042 |
| Histidine metabolism                     | 15    | 0.40656  | 1    | 0.33918  | 0       |
| Pantothenate and CoA biosynthesis        | 15    | 0.40656  | 1    | 0.33918  | 0.04082 |
| Primary bile acid biosynthesis           | 46    | 1.2468   | 2    | 0.35674  | 0.05952 |
| beta-Alanine metabolism                  | 19    | 0.51498  | 1    | 0.40875  | 0.12963 |
| Starch and sucrose metabolism            | 23    | 0.6234   | 1    | 0.47117  | 0.03778 |
| Glutathione metabolism                   | 26    | 0.70471  | 1    | 0.51372  | 0.00573 |
| Porphyrin and chlorophyll metabolism     | 27    | 0.73181  | 1    | 0.52715  | 0       |
| Cysteine and methionine metabolism       | 28    | 0.75892  | 1    | 0.54022  | 0.0694  |
| Glycerophospholipid metabolism           | 30    | 0.81312  | 1    | 0.56531  | 0.04444 |
| Glycine, serine and threonine metabolism | 32    | 0.86733  | 1    | 0.58906  | 0.29197 |
| Aminoacyl-tRNA biosynthesis              | 67    | 1.816    | 1    | 0.84839  | 0       |
| Purine metabolism                        | 68    | 1.8431   | 1    | 0.8527   | 0       |

**Table S3.** Differentially expressed proteins identified by iTRAQ.

| No | Accession | Description                              | Score   | Coverage | # Proteins | # Unique Peptides | # Peptides | # PSMs | # AAs | MW [kDa] | calc. pI | Fold change |
|----|-----------|------------------------------------------|---------|----------|------------|-------------------|------------|--------|-------|----------|----------|-------------|
| 1  | Q62636    | Ras-related protein Rap-1b               | 241.51  | 33.15%   | 1          | 1                 | 5          | 26     | 184   | 20.8     | 5.78     | 0.6         |
|    |           | Serine/threonine-protein phosphatase 2A  |         |          |            |                   |            |        |       |          |          |             |
| 2  | Q4QQT4    | 65 kDa regulatory subunit A beta isoform | 36.39   | 3.00%    | 1          | 1                 | 1          | 1      | 601   | 66       | 5.10     | 0.637       |
| 3  | P06759    | Apolipoprotein C-III                     | 163.44  | 49.50%   | 1          | 4                 | 4          | 47     | 101   | 11.1     | 4.77     | 0.657       |
| 4  | P45592    | Cofilin-1                                | 230.39  | 46.99%   | 1          | 7                 | 8          | 30     | 166   | 18.5     | 8.09     | 0.72        |
| 5  | P61589    | Transforming protein RhoA                | 23.57   | 5.18%    | 1          | 1                 | 1          | 2      | 193   | 21.8     | 6.10     | 0.725       |
| 6  | P63102    | 14-3-3 protein zeta/delta                | 502.95  | 61.22%   | 1          | 9                 | 12         | 78     | 245   | 27.8     | 4.79     | 0.739       |
| 7  | P85972    | Vinculin                                 | 695.09  | 24.02%   | 1          | 20                | 20         | 35     | 1066  | 116.5    | 6.09     | 0.76        |
| 8  | P04638    | Apolipoprotein A-II                      | 306.11  | 64.71%   | 1          | 6                 | 6          | 89     | 102   | 11.4     | 6.65     | 0.776       |
| 9  | P35213    | 14-3-3 protein beta/alpha                | 387.67  | 61.79%   | 2          | 8                 | 13         | 37     | 246   | 28       | 4.88     | 0.804       |
| 10 | P0C643    | RAS guanyl-releasing protein 2           | 54.43   | 6.58%    | 1          | 3                 | 3          | 4      | 608   | 69.2     | 7.68     | 0.814       |
| 11 | Q9Z1P2    | Alpha-actinin-1                          | 1115.24 | 6.64%    | 1          | 21                | 33         | 99     | 892   | 102.9    | 5.38     | 0.824       |



|    |        |                                            |        |        |   |   |   |    |     |      |      |       |
|----|--------|--------------------------------------------|--------|--------|---|---|---|----|-----|------|------|-------|
| 12 | P62161 | Calmodulin                                 | 174.92 | 33.56% | 2 | 5 | 5 | 24 | 149 | 16.8 | 4.22 | 0.825 |
| 13 | Q6RUV5 | Ras-related C3 botulinum toxin substrate 1 | 47.2   | 9.90%  | 1 | 2 | 2 | 4  | 192 | 21.4 | 8.50 | 1.227 |
| 14 | P20761 | Ig gamma-2B chain C region                 | 220.41 | 25.53% | 1 | 5 | 5 | 53 | 333 | 36.5 | 7.64 | 1.24  |
| 15 | P20762 | Ig gamma-2C chain C region                 | 166.7  | 27.66% | 1 | 6 | 6 | 22 | 329 | 36.5 | 8.22 | 1.306 |
| 16 | O54748 | Serine/threonine-protein kinase 3          | 22.21  | 2.24%  | 1 | 1 | 1 | 1  | 491 | 56.1 | 5.15 | 1.481 |
| 17 | Q9QUH3 | Apolipoprotein A-V                         | 218.26 | 17.98% | 1 | 5 | 5 | 11 | 367 | 41.4 | 6.48 | 1.707 |

**Table S4.** List of the pathway associated with differentially expressed proteins in the experiments.

| No | Pathway                           | Proteins                                       |
|----|-----------------------------------|------------------------------------------------|
| 1  | Wnt signaling pathway             | Q4QQT4, P61589, Q6RUV5                         |
| 2  | Adherens junction                 | P61589, P85972, Q9Z1P2, Q6RUV5                 |
| 3  | Neurotrophin signaling pathway    | Q62636, P61589, P63102, P35213, P62161, Q6RUV5 |
| 4  | B cell receptor signaling pathway | Q6RUV5, P20761, P20762                         |
| 5  | Chemokine signaling pathway       | Q62636, P61589, P0C643, Q6RUV5                 |
| 6  | PPAR signaling pathway            | P06759, P04638, Q9QUH3                         |
| 7  | Fc gamma R-mediated phagocytosis  | P45592, Q6RUV5, P20761, P20762                 |
| 8  | MAPK signaling pathway            | Q62636, P0C643, Q6RUV5, O54748                 |
